# Supplementary material for: Aspartic Aminopeptidase Is a Novel Biomarker of Aggressive Chronic Lymphocytic Leukemia
Source: PubMed Central journal article supplement (PMC7408864; doi:10.3390/cancers12071876), 2020-07-12

Supplementary Materials

## Aspartic Aminopeptidase is a Novel Biomarker of Aggressive Chronic Lymphocytic Leukemia

Pramath Kakodkar, Sanket More, Kinga Andras, Nikos Papakonstantinou, Sharon Kelly, Mohammad Adib Makrooni, Csaba Ortutay and Eva Szegezdi

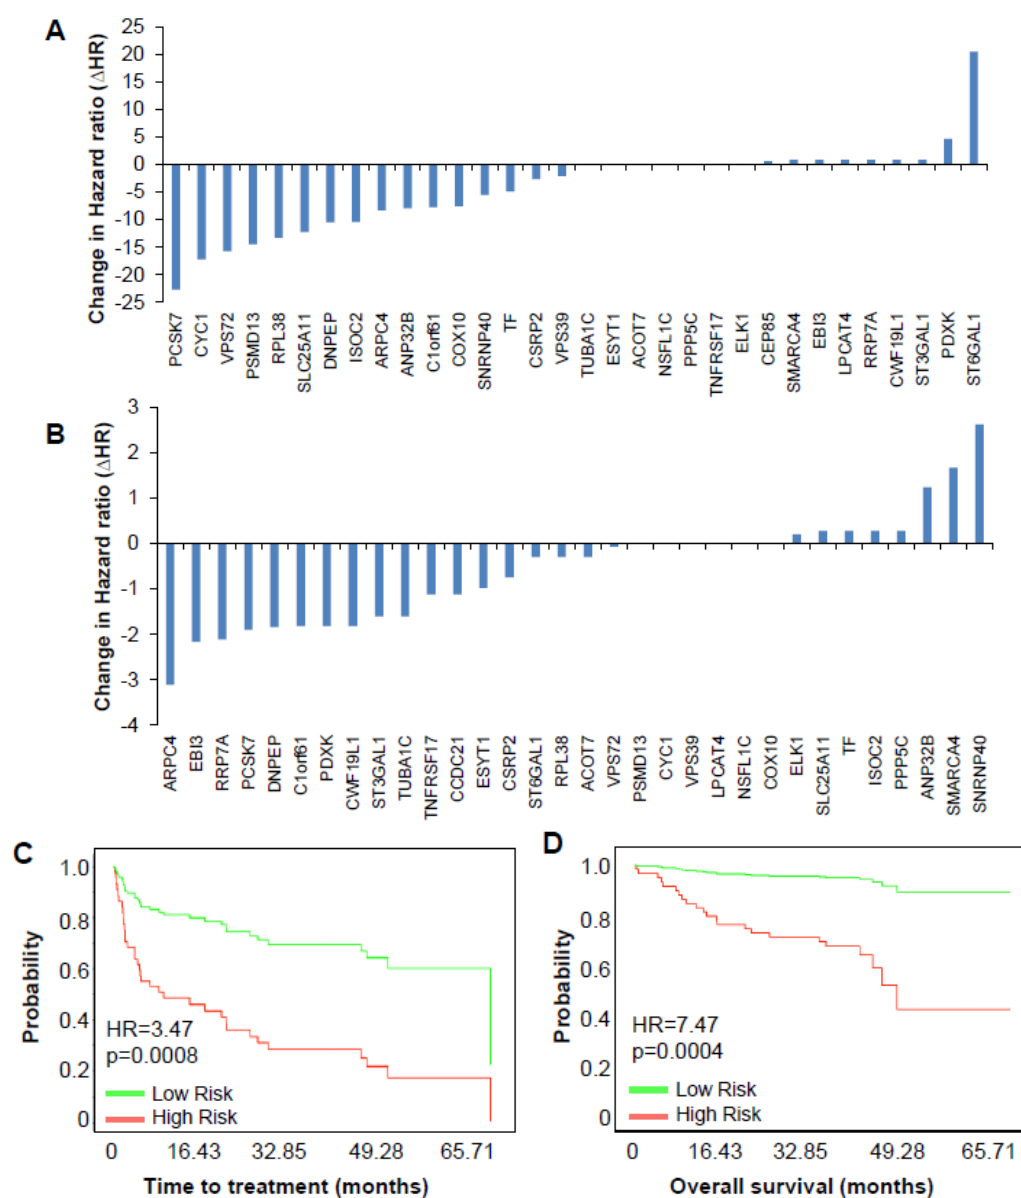

**Figure S1.** Effect of BCR-kinase correlating genes on time to treatment (A) and overall survival probability of CLL patients (B). The contribution of each of the 32 genes identified to correlate with the expression of BCR-signaling kinases was assessed by determining how they contribute to the hazard ratio (HR) of the 32 genes combined. The genes were iteratively removed from the 32-gene pool and the change in HR is plotted. (C and D) The combined prognostic potential of the top eight genes whose removal from the 32-gene set had the largest effect on the HR for time to treatment (C) and overall survival (D).

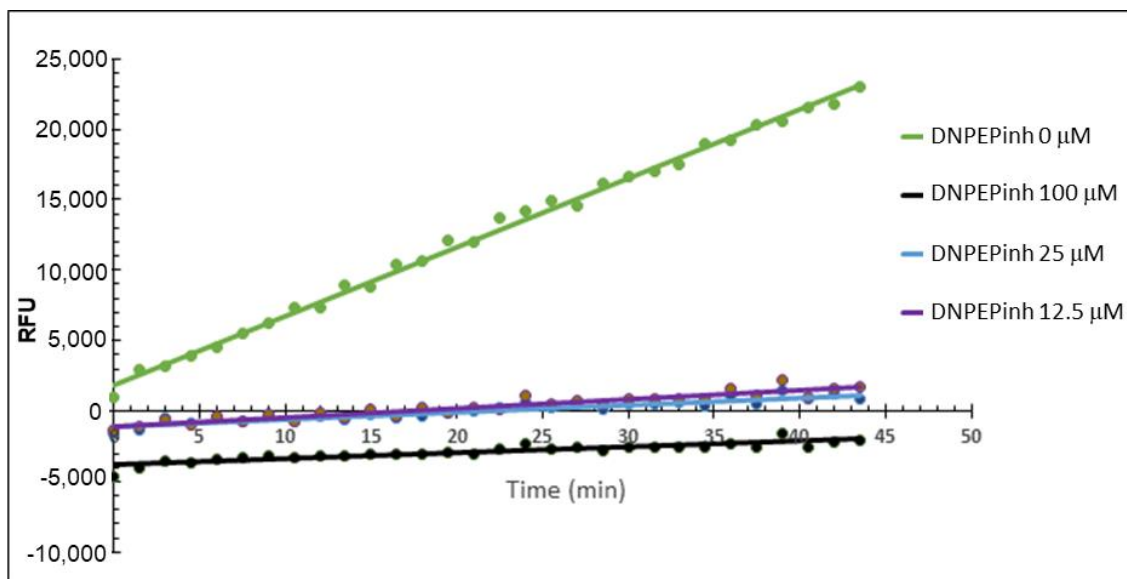

**Figure S2.** DNPEP inhibition by DI93293 enzyme kinetic assay. Mec-1 cell lysate was incubated with the indicated concentration of DI93293 for 30 minutes followed by addition of the DNPEP substrate, Asp-AMC. Cleavage of Asp-AMC was monitored over time by determining AMC fluorescence. Enzyme activity is graphed as relative fluorescence unit.

**Table S1.** Databases and selected samples for co-expression analysis.

| GEO ID   | Array ID     | Platform Design                                           | Number of Samples | Number of Genes | Experiment Description                                                                                                                                                                                                                                                            |
|----------|--------------|-----------------------------------------------------------|-------------------|-----------------|-----------------------------------------------------------------------------------------------------------------------------------------------------------------------------------------------------------------------------------------------------------------------------------|
| GSE12626 | E-GEOD-12626 | Affymetrix GeneChip Human Genome U133A 2                  | 150               | 12495           | Transcriptomic analysis of irradiated immortalized B cells. Data were collected from lymphoblastoid cells at 0, 2 and 6 hours after exposure to 10 Gy of ionizing radiation on samples from 15 Centre d'Etude du Polymorphisme Humain pedigrees.                                  |
| GSE20988 | E-GEOD-20988 | Agilent Whole Human Genome Microarray 4x44K 014850 G4112F | 32 (two-channel)  | 19004           | B cell lymphoma cell line (K1106) treated with JAK2 JMJD2C-shRNA or JAK2inhibitor. Trans-criptomic analysis at 24, 48, 72, 96 h (JAK2-shRNA), or 0.5, 2, 4, 6, 8, 16, 24, 48 h (JAK2-inh).                                                                                        |
| GSE21800 | E-GEOD-21800 | Affymetrix GeneChip Human Gene 1.0 ST Array               | 17                | 18868           | Lymphoblastoid cell lines treated with different doses of hydrogen peroxide. Gene expression was measured at 0, 4, 12, 24 and 48 hours after treatment.                                                                                                                           |
| GSE22900 | E-GEOD-22900 | Agilent Whole Human Genome Microarray 4x44K 014850 G4112F | 32 (two-channel)  | 19004           | Gene expression in HBL-1 DLBCL cells treated with the I $\kappa$ B kinase beta inhibitor MLN120B measured at 2, 3, 4, 6, 8, 12, 16, and 24 h; and with JAK inhibitor I measured at 2, 4, 6 and 8 h.                                                                               |
| GSE23591 | E-GEOD-23591 | Affymetrix GeneChip Human Gene 1.0 ST Array               | 40                | 18868           | Study of primary B cell lymphoma and Hodgkin's lymphoma cell lines. L1236 and MedB-1 lymphoma cells stimulated with IL13, gene expression measured at 0, 0.5, 1, 1.5, 2, 3, 4, 6, 8, 12 h.                                                                                        |
| GSE34176 | E-GEOD-34176 | Affymetrix GeneChip, HT Human Genome U133 HT_HG-U133A     | 29                | 8723            | Transcriptomic analysis of two DLBCL cell lines DHL4 and DHL6 treated with SKY inhibitor, R406 or vehicle (DMSO) for 0, 2, 6, 24 or 48 hours.                                                                                                                                     |
| GSE35163 | E-GEOD-35163 | Agilent Whole Human Genome Microarray 4x44K               | 64 (two-channel)  | 19004           | Gene expression upon knockdown of the PI3K-linked transcription factor TCF3 or overexpression of its negative regulator ID3 in Burkitt's lymphoma cell lines (Namalwa, BL41, Daudi, Defauw, THOMAS). Gene expression monitored between 24 – 96 h after knockdown/ overexpression. |
| GSE36910 | E-GEOD-36910 | Affymetrix GeneChip Human Genome U133A 2.0                | 285               | 12494           | Gene expression and co-expression network analysis in immortalised B cells isolated from 95 patients at baseline and after induction of cellular stress (ER stress, irradiation). Data were collected at 0, 2 and 6 hours after exposure to cellular stressors.                   |
| GSE39741 | E-GEOD-39741 | Agilent-026652 Whole Human Genome Microarray 4x44K v2     | 6 (two-channel)   | 15380           | ABC-DLBCL cell line HBL1 treated with mepazine, a MALT1 inhibitor, that inhibits antiapoptotic NF- $\kappa$ B signalling. Gene expression was determined after 6, 12, and 24 h.                                                                                                   |
| GSE41034 | E-GEOD-41034 | Agilent Whole Human Genome Microarray 4x44K               | 32 (two-channel)  | 19004           | HBL1 and Oci-Ly3 DLBCL cells treated with the I $\kappa$ B kinase beta (IKK $\beta$ ) inhibitor MLN120B and with the MALT1 inhibitor zVRPR-fmk. Gene expression was monitored over time between 2-24 h.                                                                           |
| GSE43510 | E-GEOD-43510 | Affymetrix HT_HG-U133plust2                               | 75                | 19345           | Five DLBCL cell lines DHL4, DHL6, LY7, HBL1, U2932 treated with R406 SKY inhibitor. Gene expression was measured between 6 – 24 h.                                                                                                                                                |
| GSE46971 | E-GEOD-46971 | Illumina HumanHT-12 V4.0 expression beadchip              | 16                | 21005           | Gene expression measurements of the ABC DLBCL cell line HBL1 after NFKBIZ knockdown by shRNA for 24, 48, 72, 96 hours.                                                                                                                                                            |
| GSE46972 | E-GEOD-46972 | Illumina HumanHT-12 V4.0 expression beadchip              | 12                | 19042           | Gene expression of HBL1 ABC DLBCL cell line after treatment with the IKK $\beta$ inhibitor MLN120b for 6, 12 and 24 h.                                                                                                                                                            |
| GSE46973 | E-GEOD-46973 | Agilent Whole Human Genome Microarray 4x44K 014850 G4112F | 6 (two-channel)   | 19004           | Gene expression in HBL-1 ABC DLBCL cell line after treatment with the MALT1 inhibitor, z-VRPR-fmk measured at 12, 24 or 48 h of treatment.                                                                                                                                        |

**Table S2.** List of genes correlating with ZAP-70 and at least two other BCR-signaling kinase genes.

| Entrez ID | Gene symbol | Gene Name                                                                                         | Gene Inference |      |     |       |       |        |        |
|-----------|-------------|---------------------------------------------------------------------------------------------------|----------------|------|-----|-------|-------|--------|--------|
|           |             |                                                                                                   | AKT1           | AKT2 | BTK | MAPK1 | MAPK3 | PI3KCD | ZAP-70 |
| 9159      | PCSK7       | Proprotein convertase subtilisin/ kexin type 7                                                    | ▪              | ▪    | ◦   | ▪     | ▪     | ▪      | ▪      |
| 55968     | NSFL1C      | NSFL1 (p97) cofactor (p47)                                                                        | ▪              | ◦    | ◦   | ▪     | ▪     | ▪      | ▪      |
| 64793     | CEP85       | Centrosomal protein 85kDa                                                                         | ▪              | ▪    | ◦   | ◦     | ▪     | ◦      | ▪      |
| 1352      | COX10       | COX10 heme A: farnesyltransferase cyt. c oxidase assembly factor                                  | ▪              | ◦    | ◦   | ◦     | ▪     | ▪      | ▪      |
| 2002      | ELK1        | ETS Transcription Factor ELK1                                                                     | ▪              | ◦    | ◦   | ◦     | ▪     | ▪      | ▪      |
| 5536      | PPP5C       | Protein phosphatase 5, catalytic subunit                                                          | ▪              | ◦    | ◦   | ◦     | ▪     | ▪      | ▪      |
| 11332     | ACOT7       | Acyl-CoA thioesterase 7                                                                           | ◦              | ▪    | ◦   | ◦     | ▪     | ▪      | ▪      |
| 79763     | ISOC2       | Isochorismatase domain containing 2                                                               | ◦              | ▪    | ◦   | ◦     | ▪     | ▪      | ▪      |
| 5719      | PSMD13      | Proteasome (prosome, macropain) 26S subunit, non-ATPase, 13                                       | ◦              | ◦    | ▪   | ▪     | ▪     | ◦      | ▪      |
| 6597      | SMARCA      | SWI/SNF related, matrix associated, actin dependent regulator of chromatin, subfamily A, member 4 | ▪              | ▪    | ◦   | ◦     | ▪     | ◦      | ▪      |
| 6944      | VPS72       | vacuolar protein sorting 72 homolog                                                               | ▪              | ◦    | ◦   | ▪     | ◦     | ◦      | ▪      |
| 84790     | TUBA1C      | tubulin, alpha 1c                                                                                 | ▪              | ◦    | ◦   | ◦     | ▪     | ◦      | ▪      |
| 608       | TNFRSF17    | tumor necrosis factor receptor superfamily, member 17                                             | ◦              | ▪    | ▪   | ◦     | ◦     | ◦      | ▪      |
| 27341     | RRP7A       | ribosomal RNA processing 7 homolog A                                                              | ▪              | ◦    | ◦   | ◦     | ▪     | ◦      | ▪      |
| 254531    | LPCAT4      | Lysophosphatidylcholine acyltransferase 4                                                         | ▪              | ◦    | ◦   | ◦     | ▪     | ◦      | ▪      |
| 6169      | RPL38       | ribosomal protein L38                                                                             | ◦              | ◦    | ▪   | ◦     | ▪     | ◦      | ▪      |
| 55280     | CWF19L1     | CWF19 Like Cell Cycle Control Factor 1                                                            | ◦              | ◦    | ▪   | ◦     | ▪     | ◦      | ▪      |
| 1466      | CSRP2       | cysteine and glycine-rich protein 2                                                               | ◦              | ◦    | ◦   | ▪     | ◦     | ▪      | ▪      |
| 7018      | TF          | transferrin                                                                                       | ◦              | ◦    | ◦   | ▪     | ◦     | ▪      | ▪      |
| 9410      | SNRNP40     | small nuclearribonucleo-protein 40kDa (U5)                                                        | ◦              | ◦    | ▪   | ▪     | ◦     | ◦      | ▪      |
| 23339     | VPS39       | vacuolar protein sorting 39 homolog                                                               | ◦              | ▪    | ◦   | ◦     | ▪     | ◦      | ▪      |
| 6482      | ST3GAL1     | ST3 beta-galactoside a-2,3-sialyltransferase 1                                                    | ◦              | ◦    | ◦   | ◦     | ▪     | ▪      | ▪      |
| 10093     | ARPC4       | actin related protein 2/3 complex, subunit 4,20kDa                                                | ◦              | ◦    | ◦   | ◦     | ▪     | ▪      | ▪      |
| 1537      | CYC1        | cytochrome c-1                                                                                    | ◦              | ◦    | ◦   | ▪     | ▪     | ◦      | ▪      |
| 8566      | PDXK        | pyridoxal (pyridoxine, vitamin B6) kinase                                                         | ◦              | ◦    | ◦   | ▪     | ▪     | ◦      | ▪      |
| 6480      | ST6GAL1     | ST6 beta-galactosamide alpha-2,6-sialyltransferase 1                                              | ◦              | ◦    | ◦   | ◦     | ▪     | ▪      | ▪      |
| 8402      | SLC25A11    | Solute Carrier Family 25 Member 11                                                                | ◦              | ◦    | ◦   | ◦     | ▪     | ▪      | ▪      |
| 10148     | EBI3        | Epstein-Barr virus induced 3                                                                      | ◦              | ◦    | ◦   | ◦     | ▪     | ▪      | ▪      |
| 10485     | C1orf61     | chromosome 1 open reading frame 61                                                                | ◦              | ◦    | ◦   | ◦     | ▪     | ▪      | ▪      |
| 10541     | ANP32B      | acidic (leu-rich) nuclear phosphor-protein 32 family member B                                     | ◦              | ◦    | ◦   | ◦     | ▪     | ▪      | ▪      |
| 23549     | DNPEP       | aspartyl aminopeptidase                                                                           | ◦              | ◦    | ◦   | ◦     | ▪     | ▪      | ▪      |
| 23344     | ESYT1       | extended synaptotagmin like protein 1                                                             | ◦              | ◦    | ◦   | ◦     | ▪     | ▪      | ▪      |

**Table S3.** Clinical data of patient samples used for qRT-PCRs.

| <b>No. of Included Patients</b>       | <b>34</b>   |
|---------------------------------------|-------------|
| Median age, years (range)             | 64 (47–84)  |
| Male sex, %                           | 61.7        |
| Evaluable for FISH, %                 | 100         |
| Del. 17p13, %                         | 8.82        |
| Evaluable for IGVH-status, %          | 100         |
| IGVH mutated, %                       | 79.12       |
| IGVH unmutated, %                     | 20.58       |
| Median IGVH homology, %               | 95.4        |
| Patients evaluable for Binet stage, % | 100         |
| Binet A at enrolment, %               | 82.3        |
| Binet B at enrolment, %               | 8.82        |
| Binet C at enrolment, %               | 8.82        |
| Patients evaluable for Rai stage, %   | 100         |
| Rai 0 at enrolment, %                 | 58.82       |
| Rai I at enrolment, %                 | 23.52       |
| Rai II at enrolment, %                | 5.88        |
| Rai III at enrolment, %               | 8.82        |
| Rai IV at enrolment, %                | 2.94        |
| No. of newly diagnosed CLL, %         | 100         |
| Treated at progression, %             | 41.17       |
| Samples evaluable for OS, %           | 100         |
| Deceased, %                           | 29.41       |
| CLL-unrelated death, %                | 11.76       |
| Median follow-up, years (range)       | 5.48 (0–16) |

**Supplementary R-Script****Normalization of Ct values**

```

my.target.genes<-
c("IGF2BP2","CLK1","NUP62","SLC39A14","ST3GAL1","ZAP70")
my.ref.gene<-"ABL1"
resfile<-'genewise_overexpression_with_efficiency.csv'
overexpr<-function(ct.target,ct.ref,eff.target,eff.ref){
  rat <-eff.target^ct.target/eff.ref^ct.ref
  return(rat)
}
eff <-data.frame(ABL1= 1.96,
IGF2BP2=1.91,
CLK1=1.99,
NUP62=1.93,
SLC39A14=1.99,
ST3GAL1=2.03,
ZAP70= 1.85)
reslist<-list()
for (t.genein my.target.genes){
  datafile<-paste0(t.gene,'.csv')
  my.dat <-read.csv(datafile)
  my.dat[my.dat[,t.gene]==0,t.gene] <-NA
  ct.means<-aggregate(my.dat[,2:3],
list(my.dat$Sample.ID), mean,na.rm=T)
  names(ct.means)[1] <-'Sample.ID'
  t.gene.oe<-paste0(t.gene,'.oe')
  ct.means[,t.gene.oe]<-overexpr(ct.means[,t.gene],
ct.means[,my.ref.gene],
eff[,t.gene],
eff[,my.ref.gene])
  reslist[[t.gene]] <-ct.means[,c(1,4)]
}
98
library(plyr)
t.genes.oe<-join_all(reslist)
#t.genes.oe[complete.cases(t.genes.oe),]
write.csv(t.genes.oe,resfile)

```

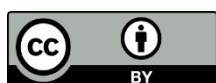

Supplement: cancers-12-01876-s001.pdf [file cancers-12-01876-s001.pdf]
